# Supplementary material
Source: PubMed Central journal article supplement (PMC5706451)
Supplement: NIHMS862314-supplement.pdf [file NIHMS862314-supplement.pdf]

Supplementary Materials

**SYSTEMIC DELIVERY OF THE TUMOR NECROSIS FACTOR GENE TO TUMORS BY A  
NOVEL DUAL DNA-NANOCOMPLEX IN A NANOPARTICLE SYSTEM**

Vasundhara Shukla, Manu Dalela, Manika Vij,  
Ralph Weichselbaum, Surender Kharbanda, Munia Ganguli  
Donald Kufe\*, and Harpal Singh\*

## Supplemental Tables S1-S3

### Supplemental Table S1.

Physical characterization of NCs and NPs.

| <b>Samples</b> | <b>Particle Size<br/>(nm)</b> | <b>PDI</b> |
|----------------|-------------------------------|------------|
| pDNA-NCs       | 80 ± 4                        | 0.08       |
| NPs            | 170 ± 2                       | 0.21       |
| pDNA-NC/NPs    | 250 ± 7                       | 0.11       |

**Supplemental Table S2.**

Hematologic parameters of mice treated with pTNF-NCs or pTNF-NC/NPs were assessed on day 21.

| Parameters                                        | Control | pTNF-NCs |      | pTNF-NC/NPs |      |
|---------------------------------------------------|---------|----------|------|-------------|------|
|                                                   |         | IT       | IP   | IT          | IP   |
| <b>Hemoglobin</b><br>(gm/dl)                      | 14.1    | 16.4     | 14.8 | 13.4        | 14.8 |
| <b>Neutrophil (%)</b>                             | 60      | 55       | 47   | 30          | 53   |
| <b>Lymphocyte (%)</b>                             | 38      | 36       | 35   | 35          | 29   |
| <b>Eosinophil (%)</b>                             | 4       | 6        | 4    | 2           | 4    |
| <b>Monocyte (%)</b>                               | 6       | 7        | 9    | 6           | 3    |
| <b>RBC</b><br>(millions/mm <sup>3</sup> )         | 5.8     | 5.0      | 5.1  | 6.83        | 4.17 |
| <b>Platelet counts</b><br>(lakh/mm <sup>3</sup> ) | 4.2     | 2.38     | 2.6  | 3.19        | 2.86 |

**Supplemental Table S3.**

Blood chemistry parameters of mice treated with pTNF-NCs or pTNF-NC/NPs were assessed on day 21.

| Parameters                                 | Control | pTNF-NCs |      | pTNF-NC/NPs |      |
|--------------------------------------------|---------|----------|------|-------------|------|
|                                            |         | IT       | IP   | IT          | IP   |
| <b>Blood Urea</b> (mg/dl)                  | 28.3    | 23.8     | 24.1 | 32.4        | 44   |
| <b>Serum Creatinine</b> (mg/dl)            | 0.6     | 0.6      | 0.5  | 1.1         | 0.99 |
| <b>Blood Urea Nitrogen (BUN)</b> (mg/dl)   | 13.6    | 11       | 12   | 13          | 12.5 |
| <b>SGOT</b> (IU/L)                         | 39      | 15       | 18   | 29          | 36   |
| <b>SGPT</b> (IU/L)                         | 22      | 44       | 38   | 40          | 39   |
| <b>Alkaline Phosphatase</b> (U/L at 37° C) | 64      | 83       | 88   | 64          | 78   |

Supplemental Figures S1-S2

A.

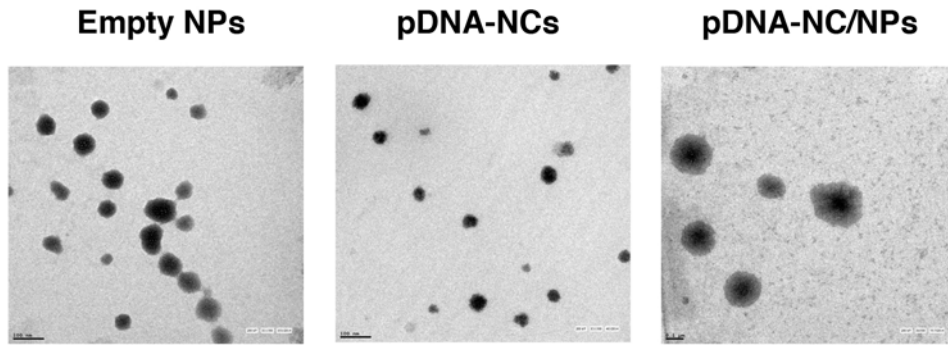

B.

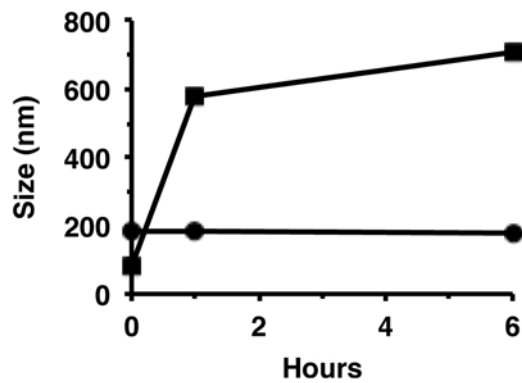

**Supplemental Figure S1. Characterization of pDNA-NCs and pDNA-NC/NPs.** A. Transmission Electron Microscopic (TEM) images of empty NPs, pDNA-NCs and pDNA-NC/NPs. B. Hydrodynamic diameter (nm) by DLS of pDNA-NCs (squares) or pDNA-NC/NPs (circles) incubated in the presence of serum for the indicated times.

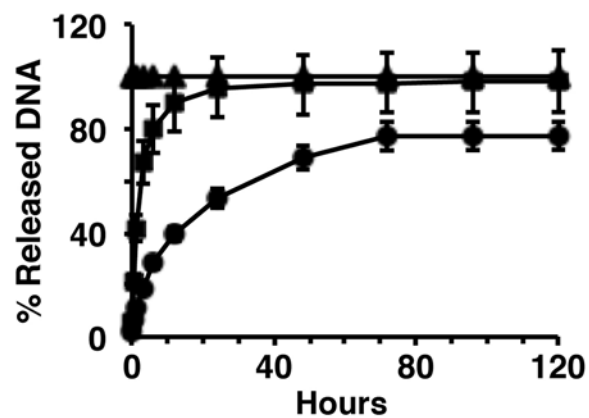

**Supplemental Figure S2. Kinetics of pDNA release.** Release of pDNA from pDNA-NCs (squares) or pDNA-NC/NPs (circles) in the presence of PBS (pH 7.4) at the indicated times. As a control, free pDNA was added separately and measured in PBS (triangles). The results represent mean $\pm$ SD of triplicate measurements.
